# Supplementary material
Source: ML conference proceedings conference paper supplement (https://proceedings.mlr.press/v38/finn15.html)
Supplement: Supplementary file 1 [file finn15-supp.pdf]

## A Sufficient Statistics Construction of Exponential Family Lévy Measure Densities for Nonparametric Conjugate Models: Supplementary Materail

**Proof of Lemma 1:** The result in Lemma 1 follows from the definition of the functional derivative and a modification of the proof in the case where the derivative is a standard partial derivative. For the sake of completeness we sketch the argument. A standard reference for the definitions that follow is [1].

Given a space  $\mathcal{B}$  of functions, for example the space of piecewise continuous functions on  $(0, \infty)$ , and a functional  $F : \mathcal{B} \rightarrow \mathbb{R}$ , the functional derivative of  $F$  with respect to  $a(x) \in \mathcal{B}$  is defined as

$$\frac{\partial F[a(x)]}{\partial a(x)} = \lim_{\varepsilon \rightarrow 0} \frac{F[a(x) + \varepsilon \delta(x)] - F[a(x)]}{\varepsilon},$$

where  $\delta(x)$  is an element of a class of test functions, usually taken to be a class of indicator functions or the class of bump functions on the domain of  $\mathcal{B}$ . Now, to prove the result in 1 from Lemma 1, it suffices to prove the result for the exponential family corresponding to the first component of  $\eta(z)$ , i.e. for  $\eta_1(z)$ . Thus, define the function  $\psi(\eta_1(z))$  by

$$\psi(\eta_1(z)) = \int \exp(\eta_1(z)T_1(x))\mu(dx).$$

Now assume  $\eta_1(z)$  is such that  $\psi(\eta_1(z))$  is finite. In addition assume  $\exists \zeta > 0$  such that  $\forall g(z) \in \mathcal{B}$  if  $|\eta_1(z) - g(z)| < \zeta$  uniformly, then  $\psi(g(z))$  exists and is finite. Let  $0 < \delta(z) \leq 1$  and  $\varepsilon_0 > 0$  be a pair such that  $|\eta_1(z) - (\eta_1(z) + \varepsilon_0 \delta(z))| < \zeta$  uniformly. Define  $\xi(z) = \eta_1(z) + \varepsilon_0 \delta(z)$  and note that

$$\begin{aligned} \frac{\psi(\xi(z)) - \psi(\eta_1(z))}{\varepsilon_0} &= \int \frac{e^{\xi(z)T_1(x)} - e^{\eta_1(z)T_1(x)}}{\varepsilon_0} \mu(dx) \\ &= \int e^{(\eta_1(z)T_1(x))} \frac{e^{(\xi(z) - \eta_1(z))T_1(x)} - 1}{\varepsilon_0} \mu(dx) = \int e^{(\eta_1(z)T_1(x))} \frac{e^{\varepsilon_0 \delta(z)T_1(x)} - 1}{\varepsilon_0} \mu(dx) \\ &\leq \int e^{(\eta_1(z)T_1(x))} \frac{e^{\zeta|\delta(z)|T_1(x)}}{\zeta} \mu(dx) \\ &\leq \int \frac{1}{\zeta} \left| e^{(\eta_1(z) + \zeta \delta(z))T_1(x)} + e^{(\eta_1(z) - \zeta \delta(z))T_1(x)} \right| \mu(dx). \end{aligned}$$

Since the above integral is finite, it follows from the Lebesgue dominated convergence theorem that

$$\lim_{\varepsilon \rightarrow 0} \frac{\psi(\xi(z)) - \psi(\eta_1(z))}{\varepsilon_0} = \int \frac{\partial}{\partial(\eta_1(z))} \left[ \exp(\eta_1(z)T_1(x)) \right] \mu(dx).$$

Extension of the above to higher order functional derivatives proceeds by a standard induction argument. Finally, part 2. of Lemma 1 follows as both the usual chain rule and multiplication by a constant rule hold for functional derivatives.

**Construction and Proof of Theorem 1:** For every pair  $n, i$  define  $\eta_{n,i} = \eta(\frac{i-\frac{1}{2}}{n})$ ,  $A_{0,n,i} = A_0(\frac{i-1}{n}, \frac{i}{n}]$ , and  $T_{k,n,i} = A_{0,n,i}T_k(s)$ , where the  $T_{k,n,i}$  are independent random variables with  $T_k(s)$  distributed according to a sufficient statistic from an exponential family with density

$$h(s) \exp \left\{ \left\langle \eta_{n,i}, T(s) \right\rangle - A(\eta_{n,i}) \right\}.$$

We use the notation  $A_0(\frac{i-1}{n}, \frac{i}{n}]$  as shorthand for  $A_0(\frac{i}{n}) - A_0(\frac{i-1}{n} +)$ . Next define

$$T_{k,n}(0) = 0 \text{ and } T_{k,n}(t) = \sum_{\frac{i}{n} \leq t} T_{k,n,i}(t) \text{ for } t \geq 0.$$

Note that with this definition,  $T_{k,n}$  has independent increments. Next, we consider  $T_k(s)$  from the exponential family  $p_\theta(x|\eta(z))$  and perform a Taylor expansion on  $e^{-\theta T_k(s)}$  yielding

$$\begin{aligned} - \int (1 - e^{-\theta T_k(s)}) dL_t(s) &= - \int \left( 1 - \left( \sum_{m=0}^{\infty} \frac{(-1)^m \theta^m T_k^m(s)}{m!} \right) \right) dL_t(s) \\ &= \sum_{m=1}^{\infty} \frac{(-1)^m \theta^m}{m!} \int T_k^m(s) dL_t(s) \\ &= \sum_{m=1}^{\infty} \frac{(-1)^m \theta^m}{m!} \int T_k^m(s) \left\{ \int_0^t e^{\langle \eta(z), T(s) \rangle - A(\eta(z))} dA_0(z) \right\} ds \\ &= \sum_{m=1}^{\infty} \frac{(-1)^m \theta^m}{m!} \int_0^t \left\{ \int T_k^m(s) e^{\langle \eta(z), T(s) \rangle - A(\eta(z))} ds \right\} dA_0(z) \\ &= \sum_{m=1}^{\infty} \frac{(-1)^m \theta^m}{m!} \int_0^t e^{-A(\eta(z))} \frac{\partial^m [e^{A(\eta(z))}]}{\partial \eta_k^m} dA_0(z). \end{aligned}$$

In the above, the last equality holds by Lemma 1.

Next, in order to compute  $\mathbb{E}[e^{-\theta T_{k,n}}]$  we must first compute  $\mathbb{E}[T_{k,n,i}^m]$ , where the expectation is with respect to the density of the random variable  $T_{k,n,i}$ . To that end we compute the density of  $T_{k,n,i}$ .

Since  $s$  is distributed according to the exponential family

$$h(x)e^{\eta(z),T(s)-A(\eta(z))},$$

as  $T_k(s)$  satisfies the conditions of the theorem, by setting  $u = T_k(s)$ , and  $v = A_{0,n,i}T_k(s)$ , a simple calculation shows that  $T_{k,n,i}$  has a density of the form

$$A_{0,n,i}^{-1} \left( \frac{dT_k^{-1}}{du} \Big|_{vA_{0,n,i}^{-1}} \right) h \left( T_k^{-1} \left( \frac{v}{A_{0,n,i}} \right) \right) \exp \left( \langle \eta_{n,i}, vA_{0,n,i}^{-1} \rangle - A(\eta_{n,i}) \right).$$

As this integrates to 1 with respect to  $v$ , we have

$$\int \left\{ A_{0,n,i}^{-1} \left( \frac{dT_k^{-1}}{du} \Big|_{vA_{0,n,i}^{-1}} \right) h \left( T_k^{-1} \left( \frac{v}{A_{0,n,i}} \right) \right) \exp \left( \langle \eta_{n,i}, vA_{0,n,i}^{-1} \rangle \right) \right\} dv = e^{A(\eta_{n,i})},$$

from which it follows that

$$\int \left\{ A_{0,n,i}^{-1} \left( \frac{dT_k^{-1}}{du} \Big|_{vA_{0,n,i}^{-1}} \right) h \left( T_k^{-1} \left( \frac{v}{A_{0,n,i}} \right) \right) \exp \left( \langle \eta_{n,i}, A_{0,n,i}^{-1} v \rangle \right) \right\} dv = e^{A(\eta_{n,i})}.$$

Therefore, taking functional derivatives of both sides with respect to  $\eta_{k,n,i}A_{0,n,i}^{-1}$ , by Lemma 1 we have

$$\begin{aligned} & \int \left\{ T_{k,n,i}^m A_{0,n,i}^{-1} \left( \frac{dT_k^{-1}}{du} \Big|_{vA_{0,n,i}^{-1}} \right) h \left( T_k^{-1} \left( \frac{v}{A_{0,n,i}} \right) \right) \exp \left( \langle \eta_{n,i}, A_{0,n,i}^{-1} v \rangle \right) \right\} dv \\ &= \frac{\partial^m}{\partial (\eta_{k,n,i} A_{0,n,i}^{-1})^m} \left[ e^{A(\eta_{n,i})} \right] = A_{0,n,i} \frac{\partial^m}{\partial (\eta_{k,n,i})^m} \left[ e^{A(\eta_{n,i})} \right]. \end{aligned} \quad (1)$$

Multiplying both sides of (1) by  $e^{-A(\eta_{n,i})}$ , we conclude that

$$\mathbb{E}[T_{k,n,i}^m] = A_{0,n,i} \left( e^{-A(\eta_{n,i})} \frac{\partial^m}{\partial (\eta_{k,n,i})^m} \left[ e^{A(\eta_{n,i})} \right] \right).$$

Thus, as  $n \rightarrow +\infty$

$$\begin{aligned} \mathbb{E}[T_{k,n}(t)] &= \sum_{\frac{i}{n} \leq t} \mathbb{E}[T_{k,n,i}(t)] = \\ & \sum_{\frac{i}{n} \leq t} A_{0,n,i} \left( e^{-A(\eta_{n,i})} \frac{\partial [e^{A(\eta_{n,i})}]}{\partial \eta_{k,n,i}} \right) \rightarrow \int_0^t e^{-A(\eta(z))} \frac{\partial [e^{A(\eta(z))}]}{\partial \eta_k(z)} dA_0(z). \end{aligned} \quad (2)$$

Now we consider the quantity  $\mathbb{E}[e^{-\theta T_{k,n,i}}]$ . Denoting the density of  $T_{k,n,i}$  by  $f_{k,n,i}(v)$  and performing a Taylor expansion on  $e^{-\theta T_{k,n,i}}$  we have

$$\begin{aligned}\mathbb{E}[e^{-\theta T_{k,n,i}}] &= \int e^{-\theta T_{k,n,i}(s)} f_{k,n,i}(v) dv = \sum_{m=0}^{\infty} \frac{(-1)^m \theta^m}{m!} \int T_{k,n,i}^m(s) f_{k,n,i}(v) dv \\ &= 1 + \sum_{m=1}^{\infty} \frac{(-1)^m \theta^m}{m!} \mathbb{E}[T_{k,n,i}^m] \\ &= 1 + \sum_{m=1}^{\infty} \frac{(-1)^m \theta^m}{m!} \left\{ A_{0,n,i} \left( e^{-A(\eta_{n,i})} \frac{\partial^m}{\partial(\eta_{k,n,i})^m} [e^{A(\eta_{n,i})}] \right) \right\},\end{aligned}$$

where, similar to (2), as  $n \rightarrow +\infty$  we have

$$\sum_{\frac{i}{n} \leq t} A_{0,n,i} \left( e^{-A(\eta_{n,i})} \frac{\partial^m [e^{A(\eta_{n,i})}]}{\partial(\eta_{k,n,i})^m} \right) \rightarrow \int_0^t e^{-A(\eta(z))} \frac{\partial^m [e^{A(\eta(z))}]}{\partial(\eta_k(z))^m} dA_0(z). \quad (3)$$

Defining

$$z_{n,i} = \sum_{m=1}^{\infty} \frac{(-1)^m \theta^m}{m!} \left\{ A_{0,n,i} \left( e^{-A(\eta_{n,i})} \frac{\partial^m}{\partial(\eta_{k,n,i})^m} [e^{A(\eta_{n,i})}] \right) \right\}$$

from (3) we conclude

$$\begin{aligned}\sum_{m=1}^{\infty} \frac{(-1)^m \theta^m}{m!} \sum_{\frac{i}{n} \leq t} \left\{ A_{0,n,i} \left( e^{-A(\eta_{n,i})} \frac{\partial^m}{\partial(\eta_{k,n,i})^m} [e^{A(\eta_{n,i})}] \right) \right\} &= \\ \sum_{\frac{i}{n} \leq t} z_{n,i} &\rightarrow - \int (1 - e^{-\theta T_k(s)}) dL_t(s).\end{aligned}$$

As

$$\mathbb{E}[e^{-\theta T_{k,n}}] = \mathbb{E} \left[ \prod_{\frac{i}{n} \leq t} \exp(-\theta T_{k,n,i}) \right] = \prod_{\frac{i}{n} \leq t} (1 + z_{n,i}),$$

we may now invoke a Lemma A.1 from Appendix 1 of [2]. We state the result here for the sake of completeness:

**Lemma 0.1** *Let  $z_{n,i}$  be real numbers, for  $n \geq 1$  and  $i \geq 1$ . Assume that, as  $n \rightarrow \infty$ , (i)  $\sum_{a < \frac{i}{n} \leq b} z_{n,i} \rightarrow z$ , (ii)  $\max_{a < \frac{i}{n} \leq b} |z_{n,i}| \rightarrow 0$ , (iii)  $\limsup \sum_{a < \frac{i}{n} \leq b} z_{n,i} \leq M < +\infty$ . Then  $\prod_{a < \frac{i}{n} \leq b} (1 + z_{n,i}) \rightarrow e^z$ .*

From the above lemma and the preceding calculations, we conclude that

$$\mathbb{E}[e^{-\theta T_{k,n}(s)}] \rightarrow \exp \left\{ - \int (1 - e^{\theta T_k(s)}) dL_t(s) \right\}.$$

As in [2] an analogous argument shows that the finite dimensional distributions of  $\{T_{k,n}(s)\}$  converge properly as well. The fact that, for all  $R > 0$ , the sequence  $\{T_{k,n}(s)\}_{n=1}^{\infty}$  is *tight* in the space  $D([0, R])$  of all functions that are right continuous with left hand limits in the Skorohod topology follows from (2) and the proof of 15.6 in [3]. Hence, as in [2], the sequence  $\{T_{k,n}(s)\}$  converges to a random element of  $D([0, R])$  for every  $R > 0$ , and the process so defined may be taken to be the  $[0, R]$  restriction of a Lévy process  $T_k$  on  $[0, \infty)$  whose Lévy representation is given in Theorem 1. This completes the proof of the theorem.

## References

- [1] I. M. Gelfand and S. V. Fomin. *Calculus of Variations*. Prentice-Hall, Inc., Englewood Cliffs, New Jersey, 1963.
- [2] Nils Lid Hjort. Nonparametric Bayes estimators based on beta processes in models for life history data. *The Annals of Statistics*, 18:1259 – 1294, 1990.
- [3] Patrick Billingsley. *Convergence of Probability Measures*. John Wiley and Sons, Inc., New York, 1968.
